# Supplementary material for: Effect of Linker Elongation on the VGSC Affinity and Anticonvulsant Activity among 4-Alkyl-5-aryl-1,2,4-triazole-3-thione Derivatives
Source: MDPI journal article supplement (doi:10.3390/molecules28135287), 2023-07-07
Supplement: s1 [file s1]

# SUPPORTING INFORMATION

**Table S1.** Docking results of the *s*-triazoles **1-4** in human Nav1.7-VSD4-NavAb protein (pdb id 5EK0)

| <i>s</i> -triazole | Posename<br># | docking score | Hyde ( $\Delta G$ ) in kJ/mol | PoseView |
|--------------------|---------------|---------------|-------------------------------|----------|
| <b>1</b>           | <b>1</b>      | -13.4         | -37                           |          |

|  |   |       |     |                                                                                                                                     |
|--|---|-------|-----|-------------------------------------------------------------------------------------------------------------------------------------|
|  | 2 | -13.0 | -36 | <p>Tyr1537</p> <p>Met1582<br/>Phe1598<br/>Val1541<br/>Asp1586<br/>Asn1540<br/>Arg1602<br/>Arg1605</p> <p>Arg1602</p>                |
|  | 3 | -12.7 | -37 | <p>Tyr1537</p> <p>Arg1602</p> <p>Asp1586<br/>Met1582<br/>Phe1598<br/>Ile1544<br/>Asn1540<br/>Ala1585<br/>Arg1605</p> <p>Arg1602</p> |

|  |   |       |     |                                                                                      |
|--|---|-------|-----|--------------------------------------------------------------------------------------|
|  | 4 | -12.4 | -25 | 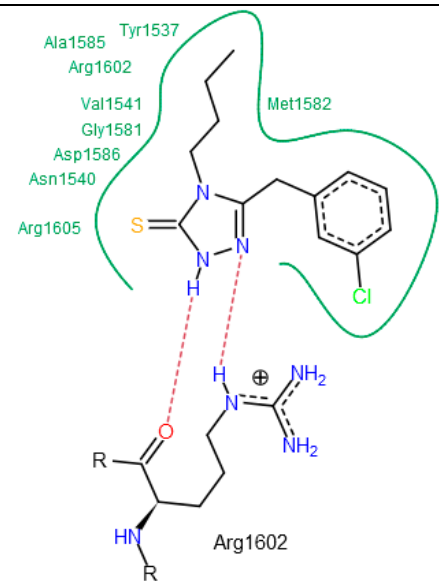  |
|  | 5 | -12.0 | -28 |  |

|  |   |       |     |                                                                                                                                                                                                                                |
|--|---|-------|-----|--------------------------------------------------------------------------------------------------------------------------------------------------------------------------------------------------------------------------------|
|  | 6 | -12.0 | -28 | <p> Arg1602<br/> Arg1605<br/> Ala1585 Met1582<br/> Ala1604 Tyr1537<br/> Phe1598<br/> Gly1581<br/> Ile1544<br/> Asp1586 </p> 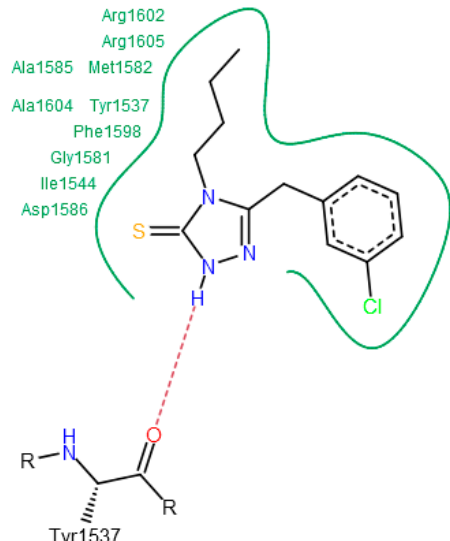 <p>Tyr1537</p> |
|  | 7 | -11.8 | -23 | <p> Ala1585 Tyr1537<br/> Arg1602<br/> Asp1586<br/> Met1582<br/> Phe1598<br/> Gly1581<br/> Arg1605 </p>  <p>Arg1602</p>                     |

|  |   |       |     |                                                                                      |
|--|---|-------|-----|--------------------------------------------------------------------------------------|
|  | 8 | -11.8 | -10 | 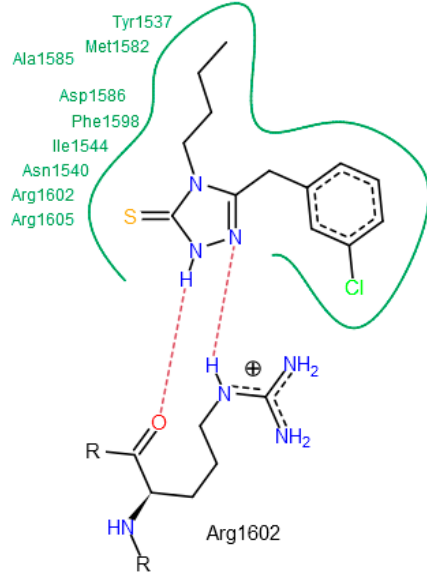  |
|  | 9 | -11.8 | -28 |  |

|   |    |       |     |                                                                                                                                                                                                                       |
|---|----|-------|-----|-----------------------------------------------------------------------------------------------------------------------------------------------------------------------------------------------------------------------|
|   | 10 | -11.7 | -31 | 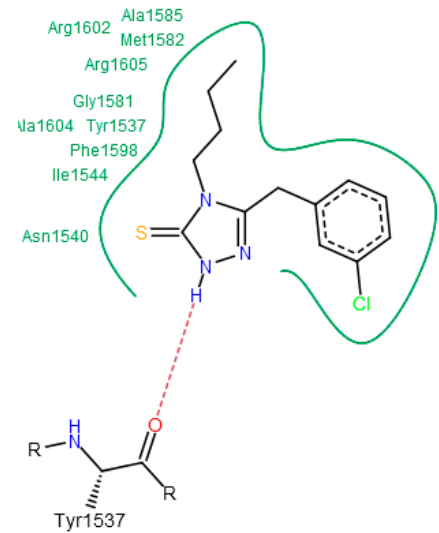 <p>Arg1602 Ala1585<br/>Met1582<br/>Arg1605<br/>Gly1581<br/>Val1604 Tyr1537<br/>Phe1598<br/>Ile1544<br/>Asn1540</p> <p>Tyr1537</p> |
| 2 | 1  | -12.1 | -40 |  <p>Tyr1537</p> <p>Met1582 Arg1602 Phe1598 Ile1544<br/>Ala1585 Asp1586 Arg1605</p> <p>Arg1602</p>                                 |

|  |   |       |     |                                                                                                                                                                                                                                                                                                                                                                                                                                                                                                                                                                                                   |
|--|---|-------|-----|---------------------------------------------------------------------------------------------------------------------------------------------------------------------------------------------------------------------------------------------------------------------------------------------------------------------------------------------------------------------------------------------------------------------------------------------------------------------------------------------------------------------------------------------------------------------------------------------------|
|  | 2 | -12.0 | -6  | <p>This diagram shows a thiazole derivative molecule docked in a protein binding pocket. The molecule features a thiazole ring with a 4-chlorophenyl group at position 4 and a heptyl chain at position 2. A red dashed line indicates a hydrogen bond between the thiazole NH and the guanidinium group of Arg1602. A green outline highlights the interaction with Tyr1537. Other residues shown include Met1582, Val1541, Asn1540, Phe1598, Arg1605, Ile1544, and Asp1598. The Arg1602 side chain is shown with its characteristic guanidinium group and a carbonyl-containing side chain.</p> |
|  | 3 | -11.3 | -41 | <p>This diagram shows the same thiazole derivative molecule docked in a protein binding pocket. The interactions are similar to the first diagram, with a red dashed line indicating a hydrogen bond between the thiazole NH and the guanidinium group of Arg1602. A green outline highlights the interaction with Tyr1537. Other residues shown include Met1582, Val1541, Arg1602, Phe1598, Ala1585, Ile1544, Asp1586, and Arg1605. The Arg1602 side chain is shown with its characteristic guanidinium group and a carbonyl-containing side chain.</p>                                          |

|  |   |       |     |  |
|--|---|-------|-----|--|
|  | 4 | -11.0 | -14 |  |
|  | 5 | -11.0 | -26 |  |
|  | 6 | -10.9 | -8  |  |

|  |   |       |     |  |
|--|---|-------|-----|--|
|  | 7 | -10.8 | -17 |  |
|  | 8 | -10.7 | -32 |  |
|  | 9 | -10.6 | -8  |  |

|   |    |       |     |                                                                                      |
|---|----|-------|-----|--------------------------------------------------------------------------------------|
|   | 10 | -10.4 | -29 | 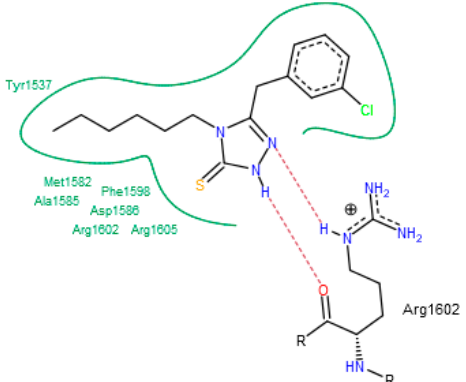  |
| 3 | 1  | -13.2 | -13 |  |

|  |   |       |       |  |
|--|---|-------|-------|--|
|  | 2 | -12.4 | -21   |  |
|  | 3 | -11.4 | -11.0 |  |

|  |   |       |     |                                                                                      |
|--|---|-------|-----|--------------------------------------------------------------------------------------|
|  | 4 | -11.0 | -34 | 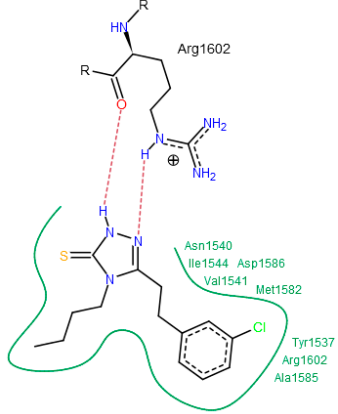  |
|  | 5 | -10.8 | -24 |  |

|  |   |       |     |  |
|--|---|-------|-----|--|
|  | 6 | -10.7 | -36 |  |
|  | 7 | -10.7 | -34 |  |

|  |   |       |     |                                                                                      |
|--|---|-------|-----|--------------------------------------------------------------------------------------|
|  | 8 | -10.6 | -34 | 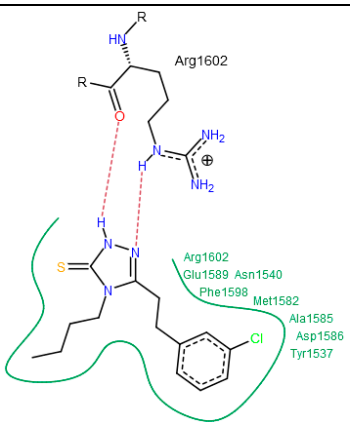  |
|  | 9 | -10.6 | -17 |  |

|   |    |       |     |                                                                                       |
|---|----|-------|-----|---------------------------------------------------------------------------------------|
|   | 10 | -10.2 | -27 | 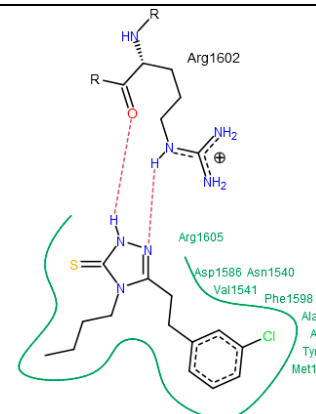   |
| 4 | 1  | -11.6 | -25 |   |
|   | 2  | -11.6 | -22 |  |

|  |   |       |     |  |
|--|---|-------|-----|--|
|  | 3 | -11.5 | -39 |  |
|  | 4 | -11.4 | -30 |  |
|  | 5 | -11.3 | -14 |  |

|  |   |       |     |                                                                                                   |
|--|---|-------|-----|---------------------------------------------------------------------------------------------------|
|  | 6 | -10.9 | -16 | <p>Tyr1537</p> <p>Met1582 Phe1598<br/>Arg1602 Asp1598<br/>Ala1585 Arg1605</p> <p>Arg1602</p>      |
|  | 7 | -10.6 | -31 | <p>Tyr1537 Val1541<br/>Met1582 Phe1598<br/>Arg1602 Asp1598<br/>Ala1585 Arg1605</p> <p>Arg1602</p> |

|  |    |       |     |  |
|--|----|-------|-----|--|
|  | 8  | -10.5 | -14 |  |
|  | 9  | -10.5 | -12 |  |
|  | 10 | -10.3 | -10 |  |

**Table S2.** Statistical evaluation of differences between means of IC<sub>50</sub> values reflecting VGSC affinity.

| Tukey's multiple comparisons test | Mean diff. | 95.00% CI of diff. | Significant? | Summary | Adjusted P value |
|-----------------------------------|------------|--------------------|--------------|---------|------------------|
| 1 vs. 2                           | 9.63       | 9.152 to 10.11     | Yes          | ****    | <0.0001          |
| 1 vs. 3                           | 3.9        | 3.422 to 4.378     | Yes          | ****    | <0.0001          |
| 1 vs. 4                           | -3.1       | -3.578 to -2.622   | Yes          | ****    | <0.0001          |
| 1 vs. veratridine                 | -2         | -2.478 to -1.522   | Yes          | ****    | <0.0001          |
| 2 vs. 3                           | -5.73      | -6.208 to -5.252   | Yes          | ****    | <0.0001          |
| 2 vs. 4                           | -12.73     | -13.21 to -12.25   | Yes          | ****    | <0.0001          |
| 2 vs. veratridine                 | -11.63     | -12.11 to -11.15   | Yes          | ****    | <0.0001          |
| 3 vs. 4                           | -7         | -7.478 to -6.522   | Yes          | ****    | <0.0001          |
| 3 vs. veratridine                 | -5.9       | -6.378 to -5.422   | Yes          | ****    | <0.0001          |
| 4 vs. veratridine                 | 1.1        | 0.622 to 1.578     | Yes          | ****    | <0.0001          |

**Table S3.** Statistical evaluation of differences between means of ED<sub>50</sub> values of compounds **3**, **4** and valproate measured at the peak of their anticonvulsant activity.

| Tukey's multiple comparisons test                             | Mean diff. | 95.00% CI of diff. | Significant? | Summary | Adjusted P value |
|---------------------------------------------------------------|------------|--------------------|--------------|---------|------------------|
| ED <sub>50</sub> of <b>3</b> vs ED <sub>50</sub> of valproate | -92.4      | -102 to -82.82     | Yes          | ****    | <0.0001          |
| ED <sub>50</sub> of <b>4</b> vs ED <sub>50</sub> of valproate | -73.6      | -83.18 to -64.02   | Yes          | ****    | <0.0001          |
| ED <sub>50</sub> of <b>3</b> vs ED <sub>50</sub> of <b>4</b>  | -18.8      | -28.38 to -9.218   | Yes          | ****    | <0.0001          |

**Table S4.** Statistical analysis of differences between ED<sub>50</sub> values showing anticonvulsant activity of compounds containing methylene linker (**1**, **2**) and ethylene linker (**3**, **4**)

| Tukey's multiple comparisons test                                                         | Mean diff. | 95.00% CI of diff. | Significant? | Summary | Adjusted P value |
|-------------------------------------------------------------------------------------------|------------|--------------------|--------------|---------|------------------|
| ED <sub>50</sub> of <b>1</b> vs ED <sub>50</sub> of <b>3</b> ( <i>butyl derivatives</i> ) | -53.4      | -61.25 to -45.55   | Yes          | ****    | <0.0001          |
| ED <sub>50</sub> of <b>2</b> vs ED <sub>50</sub> of <b>4</b> ( <i>hexyl derivatives</i> ) | -43.3      | -51.15 to -35.45   | Yes          | ****    | <0.0001          |
